# Supplementary material for: Long-term body mass trajectories and hypertension by sex among Chinese adults: a 24-year open cohort study
Source: PubMed Central journal article supplement (PMC8217242; doi:10.1038/s41598-021-92319-4), 2021-06-21

**Long-term body mass trajectories and hypertension by sex among Chinese adults: a  
24-y open cohort study**

**Short title: Trajectory of body mass and hypertension**

**Authors names and affiliations:**

Ruru Liu, PhD candidate<sup>† ‡</sup>, Baibing Mi, PhD <sup>‡</sup>, Yaling Zhao, PhD<sup>‡</sup>, Shaonong Dang, PhD<sup>‡</sup>,  
Hong Yan, PhD<sup>‡</sup>

Ruru Liu and Baibing Mi contributed equally to this work.

<sup>†</sup> Xi'an Center for Disease Control and Prevention, Xi'an, Shaanxi Province, 710054, China.

<sup>‡</sup> Department of Epidemiology and Biostatistics, School of Public Health, Xi'an Jiaotong  
University Health Science Center, Xi'an, Shaanxi Province, 710061, China

**Supplementary Table S1 Characteristics of the participants including in the final analysis ‡**

| Characteristics                 | Total       | Male        | Female      | Statistics | <i>P</i> |
|---------------------------------|-------------|-------------|-------------|------------|----------|
| No. Participants                | 14262       | 6827        | 7435        |            |          |
| Total Person*years              | 137094      | 65794       | 71300       |            |          |
| Follow-up duration (year)       | 9.6±7.0     | 9.6 ±6.9    | 9.6±7.0     | 0.17       | 0.684    |
| No. Hypertension, n (%)         | 5138 (36.0) | 2687 (39.4) | 2451 (33.0) | 63.11      | <0.001   |
| Age (y)                         | 38.8 ±14.2  | 38.2 ±14.3  | 39.3 ±14.1  | 24.27      | <0.001   |
| Education year (y)              | 7.4 ±4.3    | 8.2±3.8     | 6.7±4.6     | 432.32     | <0.001   |
| Rural, n (%)                    | 9008 (63)   | 4393 (64)   | 4615 (62)   | 7.92       | 0.005    |
| Height(cm)                      | 161.1 ±8.4  | 166.8 ±6.6  | 155.8 ±6.2  | 10540.50   | <0.001   |
| Initial BMI(kg/m <sup>2</sup> ) | 22.0 ±2.9   | 21.9 ±2.8   | 22.1 ±3.0   | 16.94      | <0.001   |
| Lean (<18.5) , n(%)             | 1226 (8.6)  | 554 (8.1)   | 672 (9.0)   |            |          |
| Normal (18.5-23.9) , n(%)       | 9835 (69)   | 4873 (71)   | 4962 (67)   | 36.54      | <0.001   |
| Overweight (24-27.9) , n(%)     | 2671 (19.0) | 1168 (17)   | 1503 (20)   |            |          |
| Obesity (≥28.0) , n(%)          | 530 (3.7)   | 232 (3.4)   | 298 (4.0)   |            |          |
| Initial weight(kg)              | 57.3 ±9.8   | 61.1 (9.7)  | 53.7 (8.5)  | 2310.33    | <0.001   |
| Initial smoker, n(%)            | 4706(33.0)  | 4401 (65)   | 305 (4.1)   | 5864.68    | <0.001   |
| Initial drinker, n(%)           | 5169 (36)   | 4262 (63)   | 907 (12)    | 3877.24    | <0.001   |
| Initial SBP(mmHg)               | 112.2 ±11.8 | 114.2 ±11.0 | 110.3 ±12.1 | 405.53     | <0.001   |
| Initial DBP(mmHg)               | 73.1 ±8.2   | 74.4 ±7.8   | 72.0 ±8.4   | 316.54     | <0.001   |

|                                              |                |                |               |         |        |
|----------------------------------------------|----------------|----------------|---------------|---------|--------|
| Initial Physical Activities (MET-hours/week) | 65.8 ±95.9     | 49.0 ±96.6     | 81.2 ±92.4    | 393.05  | <0.001 |
| Initial dietary energy (kcal)                | 2406.9 ±948.0  | 2615.2 ±840.0  | 2218.1 ±999.4 | 636.57  | <0.001 |
| Current BMI(kg/m <sup>2</sup> )              | 23.2 ±3.4      | 23.3 ±3.3      | 23.2 ±3.4     | 0.14    | 0.712  |
| Lean (<18.5), n(%)                           | 950 (6.7)      | 426 (6.2)      | 524 (7.0)     |         |        |
| Normal (18.5-23.9), n(%)                     | 7745 (54.0)    | 3704 (54.0)    | 4041 (54.0)   | 9.59    | 0.022  |
| Overweight (24-27.9), n(%)                   | 4274 (30.0)    | 2107 (31.0)    | 2167 (29.0)   |         |        |
| Obesity (≥28.0), n(%)                        | 1293 (9.1)     | 590 (8.6)      | 703 (9.5)     |         |        |
| Current weight(kg)                           | 60.5 (11.2)    | 64.9 (11.2)    | 56.4 (9.6)    | 2364.02 | <0.001 |
| Current smoker, n(%)                         | 4276 (30.0)    | 4024 (59.0)    | 252 (3.4)     | 5243.47 | <0.001 |
| Current drinker, n(%)                        | 4453 (31.0)    | 3869 (57.0)    | 584 (7.9)     | 4279.84 | <0.001 |
| Current SBP(mmHg)                            | 123.5 ±17.6    | 125.1 ±16.8    | 121.9 ±18.2   | 117.24  | <0.001 |
| Current DBP(mmHg)                            | 79.0 ±10.6     | 80.6 ±10.5     | 77.6 ±10.4    | 305.38  | <0.001 |
| Current physical activities (MET hours/week) | 131.6 ±131.6   | 133.7 ±140.7   | 129.5 ±123.2  | 3.51    | 0.061  |
| Current dietary energy (kcal)                | 2086.2 ±1038.9 | 2283.9 ±1095.1 | 1904.9 ±949.0 | 488.05  | <0.001 |

---

‡ Values in table are mean ±SD or N (Percent); Missing data are handled in the analysis; BMI, body mass index; SBP, systolic blood pressure; DBP, diastolic blood pressure

## **Supplementary Text. The model fitting procedure of BMI change trajectory and goodness of model fitting**

Using a maximum-likelihood approach, LCTA estimated multiple regression models simultaneously and calculated from the model parameters the probability of each participants belonging to each trajectory group. The model fitting procedure of BMI change trajectory with Proc Traj is listed as follows:

**Step 1.** Decide on the optimal number of groups using substantive knowledge. Based on previous researches (1, 2) and our substantive knowledge about the long-term change of BMI characteristics, we decided to fit two- to five-group models of BMI change trajectories.

**Step 2.** Fit number of groups to data. To determine the optimal number of trajectory groups included in the model, we compared Bayesian Information Criteria (BIC) between models with different groups. A smaller BIC value indicated a better fit (3), but as the number of groups was increased across models, the additional reduction of BIC became smaller (**Supplementary Table S3**). Following the existing guidelines (4, 5), we chose the model when additional groups failed to increase BIC by at least half of the BIC in the previous model and the value of group membership probability  $\geq 5\%$ .

**Step 3.** Select the shape of the pattern of change for each group over time. After the number of groups was selected, we determined further the shape of each trajectory group using a stepwise approach in establishing polynomial order, with all groups initially set to cubic order. As the order of each trajectory was set to quadratic, linear, and intercept respectively, we compared the changes in BIC and the significance of parameters across models. Based on the substantive knowledge and statistical inference, the cubic trajectory pattern with four trajectory groups was regarded as the best fitting for the data.

Once a model was selected, we examined the posterior probabilities for each trajectory group to ensure all groups provided evidence for adequate model fitting. A general rule required an acceptable model to have a minimum average posterior probability of 0.70 for all trajectories (4). In this study, average posterior probabilities for all trajectories were at least 0.75 (**Supplementary Table S4**)

## **References**

1. Ye M, Robson PJ, Eurich DT, Vena JE, Xu JY, Johnson JA. Changes in body mass index and

incidence of diabetes: A longitudinal study of Alberta's Tomorrow Project Cohort. *Preventive medicine*. 2018;106:157-63.

2. Wang M, Yi Y, Roebathan B, Colbourne J, Maddalena V, Wang PP, et al. Body Mass Index Trajectories among Middle-Aged and Elderly Canadians and Associated Health Outcomes. *J Environ Public Health*. 2016;2016:7014857.

3. Nagin DS. Analyzing developmental trajectories: a semiparametric, group-based approach. *Psychological methods*. 1999;4(2):139.

4. Nagin DS, NAGIN D. *Group-based modeling of development*: Harvard University Press; 2005.

5. Jones BL, Nagin DS, Roeder K. A SAS procedure based on mixture models for estimating developmental trajectories. *Sociological methods & research*. 2001;29(3):374-93.

**Supplementary Table S2. Tabulated Bayesian Information Criterion(BIC) for all participants**

| Number of Groups | BIC               | Group membership probability (%) |              |              |              |         |
|------------------|-------------------|----------------------------------|--------------|--------------|--------------|---------|
|                  |                   | Group 1                          | Group 2      | Group 3      | Group 4      | Group 5 |
| 2                | -121977.99        | 58.70                            | 41.30        |              |              |         |
| 3                | -117907.51        | 26.93                            | 54.28        | 18.78        |              |         |
| <b>4</b>         | <b>-115720.08</b> | <b>9.19</b>                      | <b>41.47</b> | <b>38.09</b> | <b>11.25</b> |         |
| 5                | -114448.35        | 4.44                             | 39.29        | 26.46        | 22.91        | 6.90    |

**Supplementary Table S3. Parameters estimated for BMI trajectory change pattern ‡**

| BMI trajectory change pattern |                  | Intercept term | Linear term | Quadratic term | Cubic term            | Group membership probability (%) | Average posterior probability (%) |
|-------------------------------|------------------|----------------|-------------|----------------|-----------------------|----------------------------------|-----------------------------------|
| All participants              | Loss             | 0.069          | -0.651      | 0.051          | 1.0×10 <sup>-3</sup>  | 7.94                             | 84.6                              |
|                               | Stable           | 0.263          | 0.0293      | -0.002         | 1.00×10 <sup>-4</sup> | 44.0                             | 75.2                              |
|                               | Moderate gain    | 0.278          | 0.287       | -0.009         | 1.90×10 <sup>-4</sup> | 38.1                             | 75.5                              |
|                               | Substantial gain | 0.070          | 0.882       | -0.051         | 0.001                 | 9.93                             | 85.6                              |
| Male                          | Loss             | 0.027          | -0.780      | 0.062          | 1.0×10 <sup>-3</sup>  | 5.68                             | 75.8                              |
|                               | Stable           | 0.303          | -0.015      | 0.002          | -                     | 40.94                            | 81.1                              |
|                               | Moderate gain    | 0.339          | 0.273       | -0.010         | 2.3×10 <sup>-4</sup>  | 40.85                            | 79.3                              |
|                               | Substantial gain | 0.224          | 0.866       | -0.050         | 1.1×10 <sup>-3</sup>  | 12.52                            | 87.4                              |
| Female                        | Loss             | 0.039          | -0.556      | 0.041          | 9.2×10 <sup>-4</sup>  | 10.01                            | 84.1                              |
|                               | Stable           | 0.229          | 0.016       | 0.001          | -                     | 46.90                            | 76.7                              |
|                               | Moderate gain    | 0.195          | 0.305       | -0.01          | 1.8×10 <sup>-4</sup>  | 35.55                            | 79.8                              |
|                               | Substantial gain | -0.117         | 0.894       | -0.053         | 0.001                 | 7.55                             | 80.5                              |

‡ Parameter estimate presented the shape of each pattern of trajectory over time. Intercept term interpreted as the expected level of change of BMI in kg/m<sup>2</sup> at the first year of follow-up. Linear term interpreted as the linear slope of change of BMI by follow-up year. Quadratic term interpreted as the quadratic slope and cubic term interpreted as the cubic slope.

**Supplementary Table S4. Sensitivity analysis of the associations between different patterns of BMI trajectories and the risk of hypertension ‡**

| BMI change trajectories | Exclude follow-up $\leq 4$ yrs |                | Exclude chronic diseases |                | Multiple Imputation |                |
|-------------------------|--------------------------------|----------------|--------------------------|----------------|---------------------|----------------|
|                         | HR(95% CI) †                   | <i>P</i> value | HR(95% CI) †             | <i>P</i> value | HR(95% CI) †        | <i>P</i> value |
| <b>Male</b>             |                                |                |                          |                |                     |                |
| Loss                    | 0.78 (0.63-0.96)               | 0.018          | 0.69(0.56-0.85)          | 0.001          | 0.72(0.61-0.85)     | 0.001          |
| Stable                  | Ref.                           |                | Ref.                     |                | Ref.                |                |
| Moderate gain           | 1.26 (1.14-1.39)               | <0.001         | 1.22(1.12-1.34)          | <0.001         | 1.21(1.12-1.32)     | <0.001         |
| Substantial gain        | 1.79 (1.56-2.06)               | <0.001         | 1.65(1.45-1.88)          | <0.001         | 1.64(1.44-1.87)     | <0.001         |
| <b>Female</b>           |                                |                |                          |                |                     |                |
| Loss                    | 0.82 (0.70-0.98)               | 0.025          | 0.92(0.79-1.08)          | 0.327          | 0.85(0.73-1.00)     | 0.046          |
| Stable                  | Ref.                           |                | Ref.                     |                | Ref.                |                |
| Moderate gain           | 1.30 (1.18-1.44)               | <0.001         | 1.29(1.17-1.42)          | <0.001         | 1.28(1.17-1.40)     | <0.001         |
| Substantial gain        | 1.86 (1.58-2.20)               | <0.001         | 1.93(1.65-2.26)          | <0.001         | 1.86(1.62-2.14)     | <0.001         |

‡ all models adjusted variables including age at baseline, survey wave, BMI at baseline, initial SBP and DBP, current smoking and alcohol consumption, current physical activity and dietary energy intake.

† HR, hazard ration. CI, confidence interval



**Supplementary Table S5 Characteristics of participants in analytic sample and excluded samples †**

| Characteristics                     | Analytic sample | Excluded sample | Statistics* | <i>P</i> |
|-------------------------------------|-----------------|-----------------|-------------|----------|
| No. Participants                    | 14262           | 18232           |             |          |
| Male(%)                             | 6827(47.9)      | 8930(48.9)      | 3.96        | 0.047    |
| Age (y)                             | 38.8 ±14.2      | 22.7±19.1       | 88.11       | <0.001   |
| Education year (y)                  | 7.4±4.3         | 7.6±4.4         | 4.11        | <0.002   |
| Rural, n(%)                         | 9008 (63.0)     | 10939(90.0)     | 33.75       | <0.001   |
| Initial weight(kg)                  | 57.3±9.8        | 42.3±21.7       | 76.66       | <0.002   |
| Initial BMI (kg/m <sup>2</sup> )    | 22.0 ±2.9       | 19.9±5.0        | 44.63       | <0.001   |
| Initial SBP(mmHg)                   | 112.2 ±11.8     | 110.7±20.1      | 7.91        | <0.001   |
| Initial DBP(mmHg)                   | 73.1 ±8.2       | 71.2±20.1       | 10.06       | <0.001   |
| Initial smoker, n(%)                | 4706 (33.0)     | 4193(23.0)      | 402.30      | <0.001   |
| Initial drinker, n(%)               | 5169 (36.0)     | 4011(21.9)      | 800.91      | <0.001   |
| Physical Activities(MET-hours/week) | 65.8±95.9       | 87.1±102.5      | 19.14       | <0.001   |
| Dietary Total Energy(kcal)          | 2086.2 ±1038.9  | 1759.3±1422.0   | 23.06       | <0.001   |

† Values in table are mean ±SD or N (Percent); Missing data are handled in the analysis; BMI, body mass index; SBP, systolic blood pressure; DBP, diastolic blood pressure

\* t test for continuous variable and Chi square for category variable.

**Supplementary Fig.S1. Subgroup analysis for the associations between different patterns of BMI trajectories and the risk of hypertension in males.**

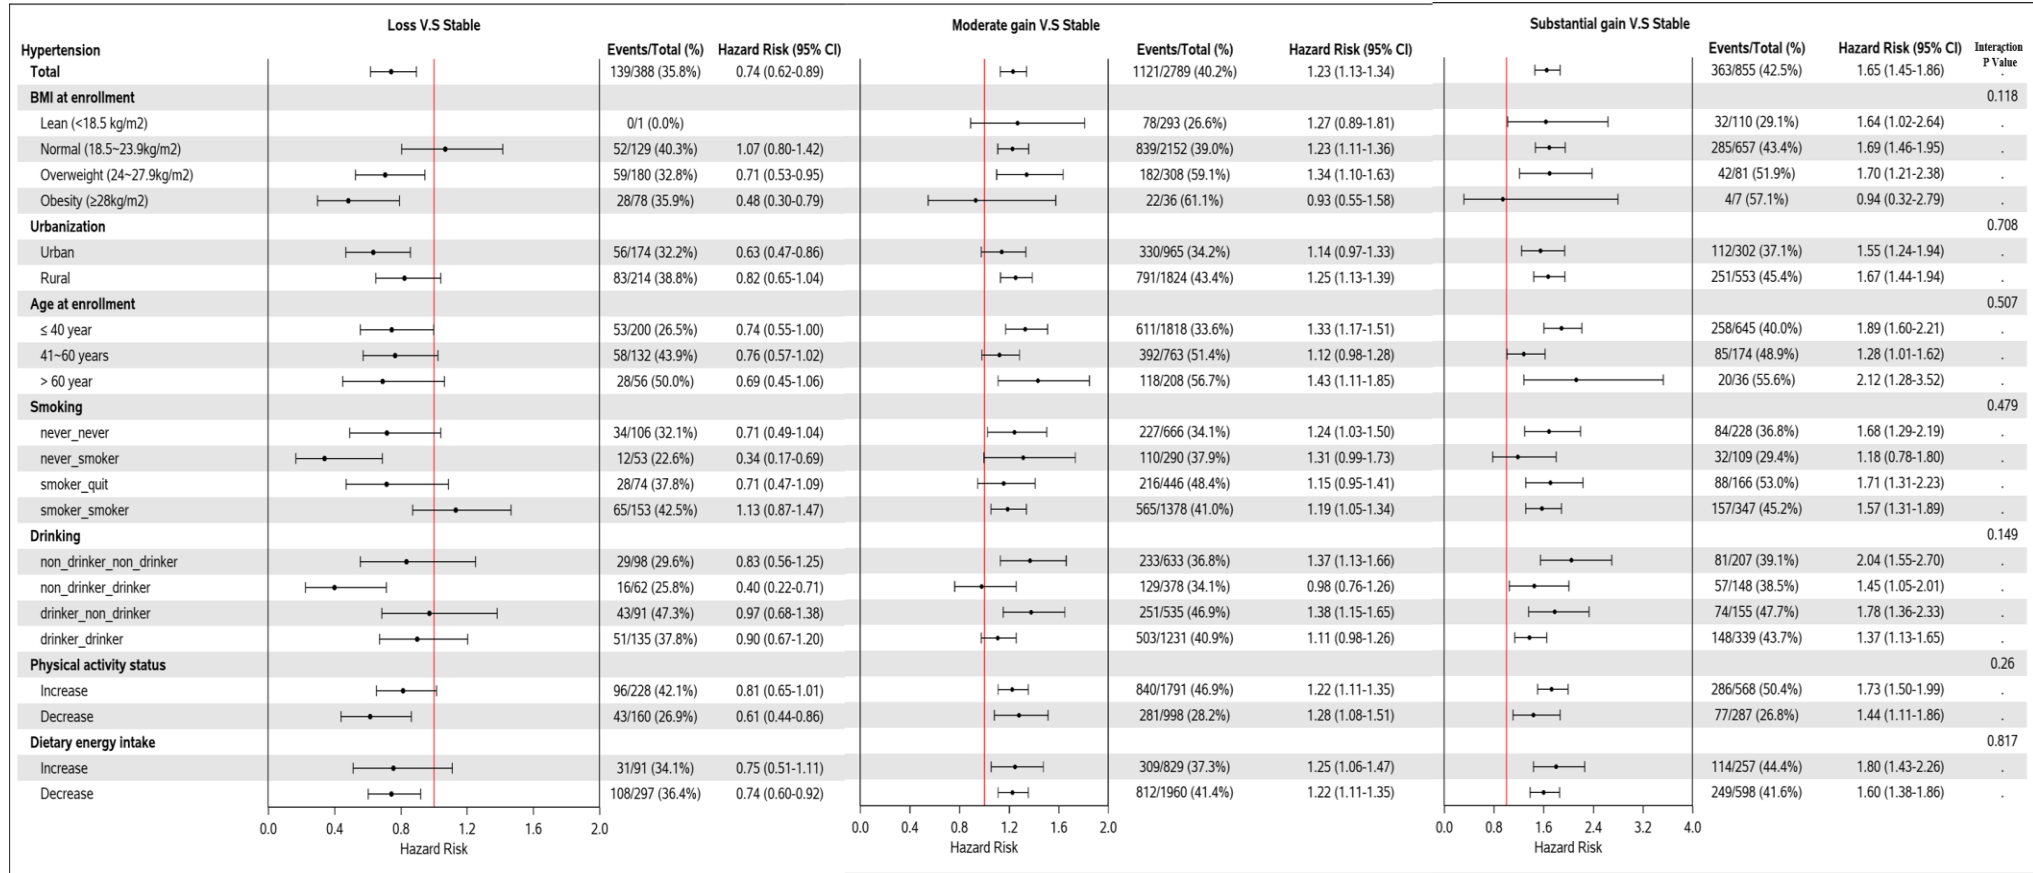

**Supplementary Fig.S2. Subgroup analysis for the associations between different patterns of BMI trajectories and the risk of hypertension in females.**

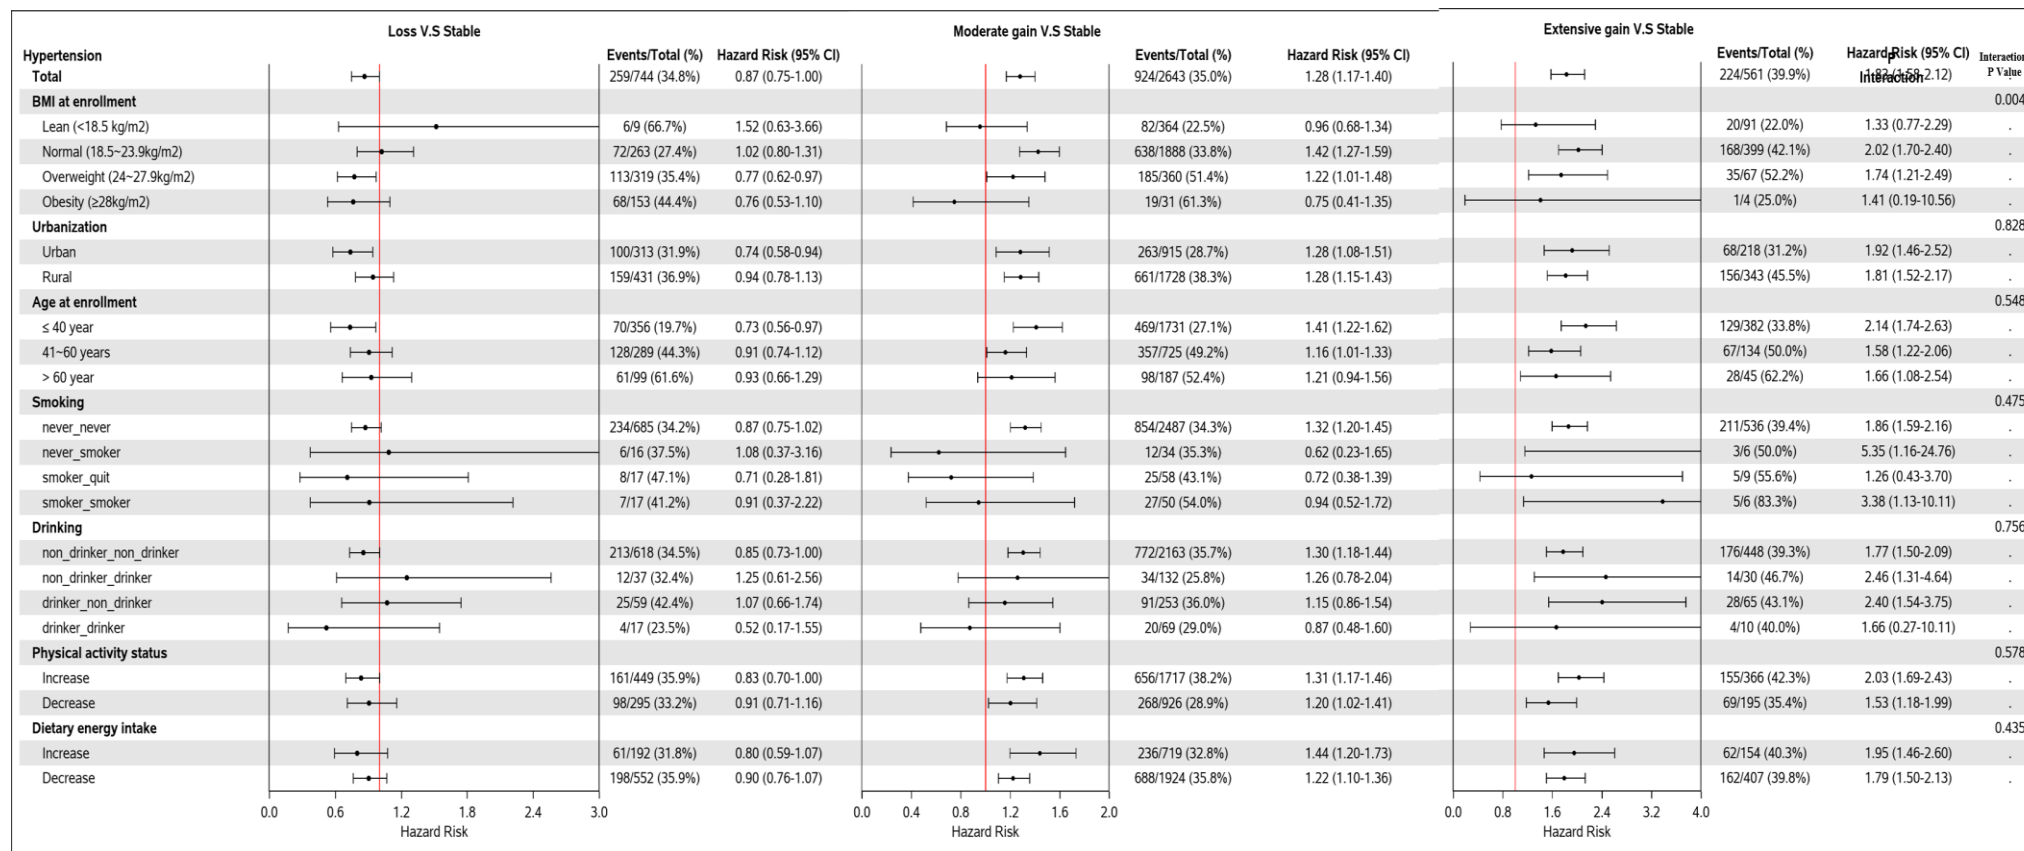

**Supplementary Fig.S3. the directed acyclic graph among the potential covariates in the association between the pattern of longitudinal BMI change trajectories and hypertension**

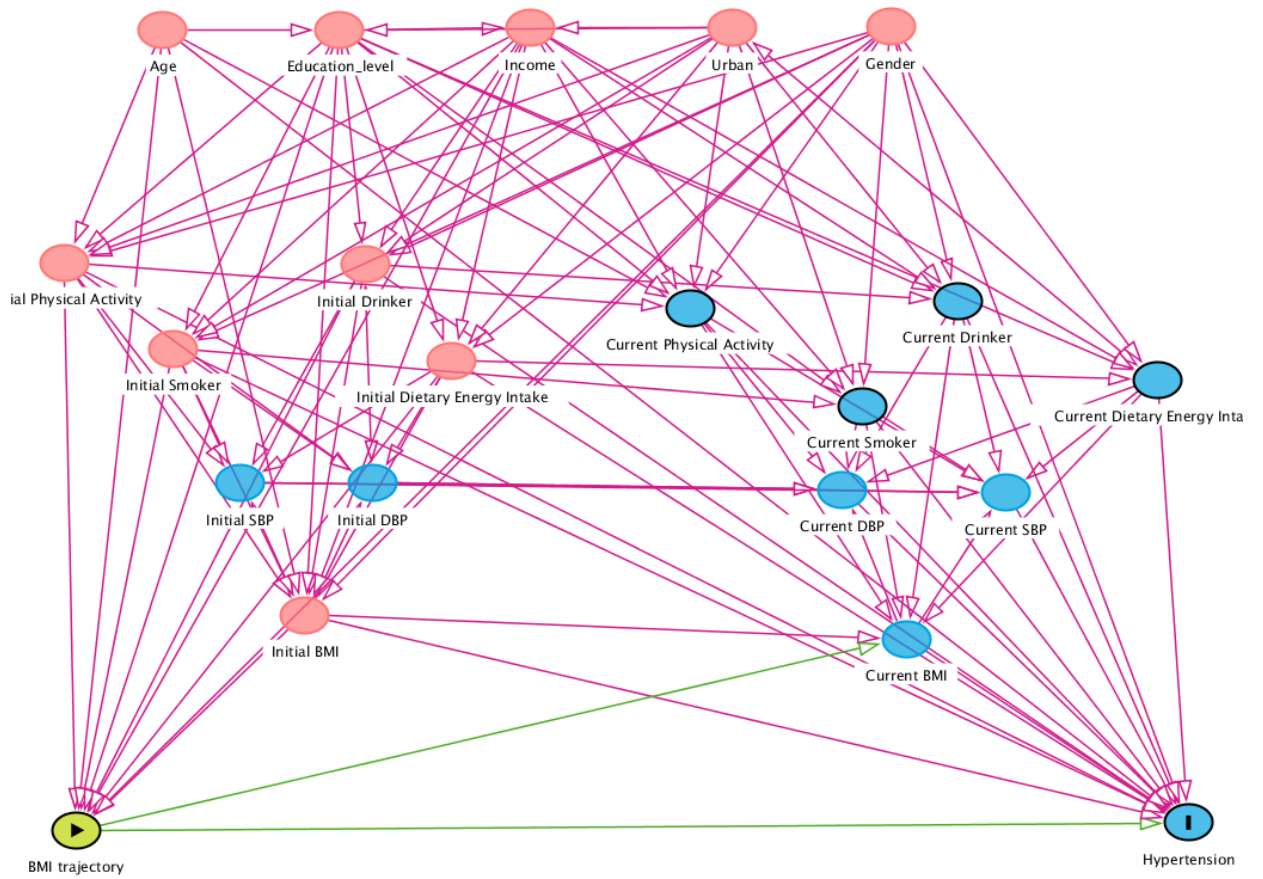

Supplement: 41598_2021_92319_MOESM1_ESM.pdf [file 41598_2021_92319_MOESM1_ESM.pdf]
